# Supplementary material for: Hematological parameters abnormalities and associated factors in HIV-positive adults before and after highly active antiretroviral treatment in Goba Referral Hospital, southeast Ethiopia: A cross-sectional study
Source: PubMed Central journal article supplement — SAGE Open Med. 2021 May 28;9:20503121211020175. doi: 10.1177/20503121211020175 (PMC8165838; doi:10.1177/20503121211020175), 2021-05-28
Supplement: sj-pdf-1-smo-10.1177_20503121211020175.pdf [file sj-pdf-1-smo-10.1177_20503121211020175.pdf]

## Data collection questionnaire (English Version)

**Title of the study:** Hematological parameters abnormalities and associated factors in HIV-positive adults before and after highly active antiretroviral treatment in Goba Referral Hospital, southeast Ethiopia: a cross-sectional study

**Introduction to the study:** This study is aimed to determine the hematological abnormalities and associated factors among HIV-positive adult individuals before and after highly active antiretroviral treatment (HAART) which is the major cause of morbidity and mortality among infected individuals, especially before the initiation of HAART, and to provide recommendations possible in prevention and control of the problem and use them for effective intervention plan in the future.

The involvement in this study is based on genuine voluntary basis and you have the right to refuse to participate in the study as well as withdraw at any stage of the participation. Confidentiality of all information gathered will be kept and all clinical and laboratory data gathered will be only used for the purpose of this study. The result of all laboratory findings will be communicated to your physician or care giver.

**Direction for data collector:** Please encircle the number of your answer or correctly fill in the black space provided for open ended questions.

### Part one: Socio-demographic data

| No: | Questions                                            | Answers                                                                                                                               |
|-----|------------------------------------------------------|---------------------------------------------------------------------------------------------------------------------------------------|
| 1   | Identification                                       | Code number.....                                                                                                                      |
| 2   | Sex of patients                                      | 1. Male                      2. Female                                                                                                |
| 3   | Age of patients in years                             |                                                                                                                                       |
| 4   | Where do you live?                                   | 1. Urban                      2. Rural                                                                                                |
| 5   | What is your educational status?                     | 1. Unable to read and write<br>2. Able to read and write<br>3. Elementary School<br>4. Secondary school<br>5. Certificate and above   |
| 6   | What is your occupation?                             | 1. Farmer<br>2. Housewife<br>3. Private<br>4. Daily laborer<br>5. Governmental Employee<br>6. NGO employee<br>7. Other, specify _____ |
| 7   | What is your current marital status?                 | 1. Single<br>2. Married<br>3. Divorced<br>4. Widowed                                                                                  |
| 8   | What is your average monthly family income? (in ETB) |                                                                                                                                       |
| 9   | What is the size of your household?                  |                                                                                                                                       |

### Part two: Clinical data

| No: | Questions                                      | Answers                                                  |
|-----|------------------------------------------------|----------------------------------------------------------|
| 10  | WHO clinical stage (from <i>patient card</i> ) | 1. Stage I<br>2. Stage II<br>3. Stage III<br>4. Stage IV |
| 11  | Opportunistic infection:<br>If yes, go to 12   | 1. Yes                      2. No                        |
| 12  | Which one?                                     | 1. Herpes Zoster<br>2. Candidiasis<br>3. Pneumonia       |

|    |                                                         |                                                                                                                     |
|----|---------------------------------------------------------|---------------------------------------------------------------------------------------------------------------------|
|    |                                                         | 4. Tuberculosis<br>5. Other.....                                                                                    |
| 13 | History of chronic illness?<br>If <b>yes</b> , go to 14 | 1. Yes                      2. No                                                                                   |
| 14 | Which one?                                              | 1. TB    2. DM    3. Hypertension 4. other ...                                                                      |
| 15 | Type of HAART regimen (from card)                       | 1. ZDV, 3TC, EFV<br>2. ZDV, 3TC, NVP<br>3. TDF, 3TC, EFV<br>4. TDF, 3TC, NVP<br>5. TDF, 3TC, LPV/r<br>6. Others ... |
| 16 | Duration of HAART (in months)                           |                                                                                                                     |
| 17 | Body Mass Index (BMI in kg/m <sup>2</sup> )             | Height (m).....    Weight (kg).....                                                                                 |

### Part three: Laboratory data

Laboratory result printouts for complete blood cell (CBC) and CD4+ T-lymphocyte counts will be attached with this questionnaire.

### Part four: Data extraction form for base line clinical data

| No:                                                             | Variable                   | Categories                           |
|-----------------------------------------------------------------|----------------------------|--------------------------------------|
| <b>Part One: Socio-Demographic and Baseline Characteristics</b> |                            |                                      |
| <b>1</b>                                                        | ART Unique Number(code no) |                                      |
| <b>2</b>                                                        | Age in years               |                                      |
| <b>3</b>                                                        | Sex                        | 1.Male                      2.Female |
| <b>4</b>                                                        | CD4                        | cells/μl                             |
| <b>5</b>                                                        | RBC                        | cells/μl                             |
| <b>6</b>                                                        | Hgb                        | g/dl                                 |
| <b>7</b>                                                        | Hct                        | %                                    |
| <b>8</b>                                                        | MCV                        | fl                                   |
| <b>9</b>                                                        | MCH                        | gm/dl                                |

|           |                                                           |                                                                                        |
|-----------|-----------------------------------------------------------|----------------------------------------------------------------------------------------|
| <b>10</b> | MCHC                                                      | pg                                                                                     |
| <b>11</b> | RDW                                                       | %                                                                                      |
| <b>12</b> | WBC                                                       | cells/ $\mu$ l                                                                         |
| <b>13</b> | Total lymphocyte count                                    | cells/ $\mu$ l                                                                         |
| <b>14</b> | Absolute neutrophil count                                 | cells/ $\mu$ l                                                                         |
| <b>15</b> | Platelet                                                  | cells/ $\mu$ l                                                                         |
| <b>16</b> | WHO stage                                                 | 1. Stage I<br>2. Stage II<br>3. Stage III<br>4. Stage IV                               |
| <b>17</b> | Body Mass Index (BMI in kg/m <sup>2</sup> )               |                                                                                        |
| <b>18</b> | Opportunistic infection if <b>yes</b> , go to 19 question | 1) Yes    2) No    3) Not recorded                                                     |
| <b>19</b> | Which one?                                                | 1. Herpes Zoster    2. Candidiasis<br>3. Pneumonia    4. Tuberculosis    5. Other..... |
